# Supplementary material
Source: Springer Nature journal article supplement (https://www.springermedizin.de/resource/supplementary/12885_2010_2812_MOESM4_ESM.pdf/9462064)

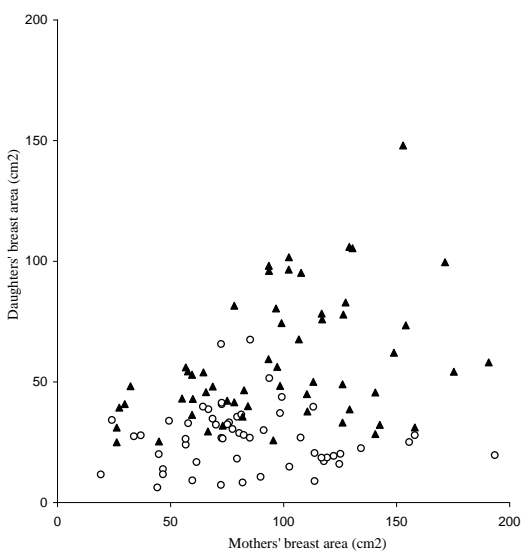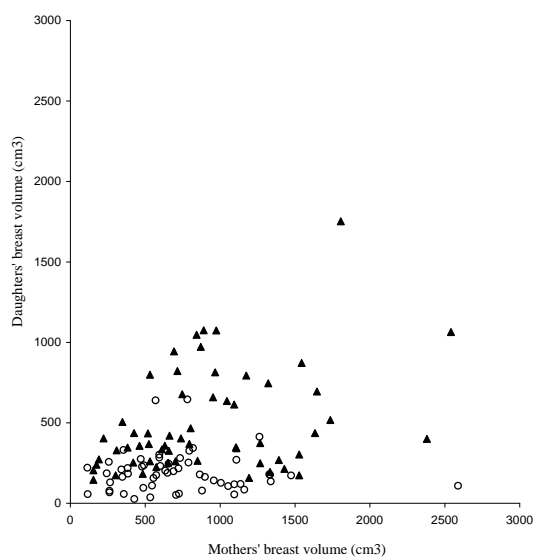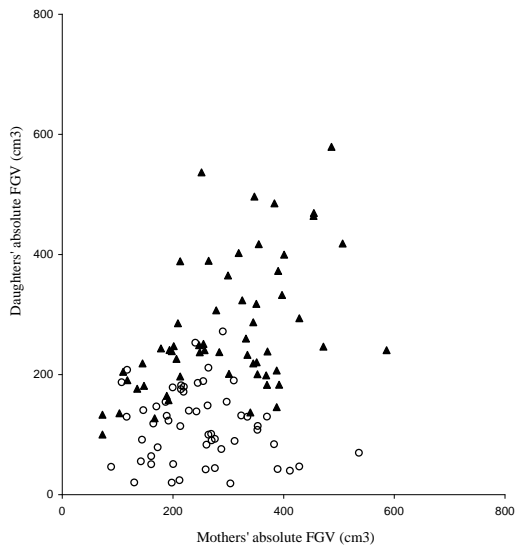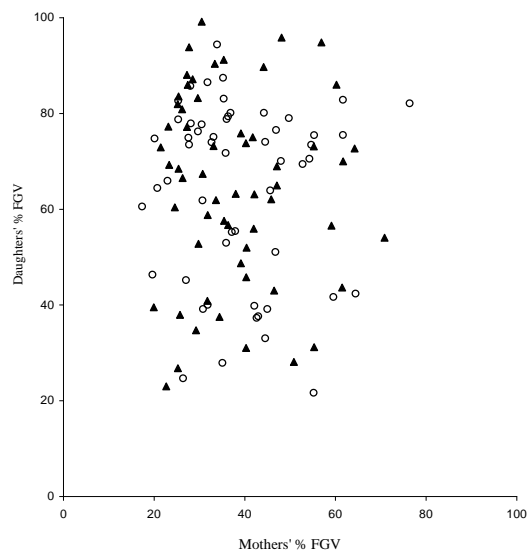

○: Tanner breast stages 1, 2 and 3    ▲: Tanner breast stages 4 and 5

Supplement: MOESM4 [file 9462064]
